# Supplementary material for: Estimates of CO2 from fires in the United States: implications for carbon management
Source: Springer Nature journal article supplement (doi:10.1186/1750-0680-2-10), 2007-11-01
Supplement: Additional file 1 [file 1750-0680-2-10-s1.doc]

# Additional files

### Additional file 1 – Emissions of CO2 from FFB and NPP for each state.

|  |  |  |  |  |  |  |  |  |  |  |  |  | Tg CO2 year-1 | |  |  |  |
| --- | --- | --- | --- | --- | --- | --- | --- | --- | --- | --- | --- | --- | --- | --- | --- | --- | --- |
|  | Monthly Emissions from Fires (Tg CO2 month-1) | | | | | | |  |  |  |  |  | Annual Fire Emissions | | FFB Emissions | | NPP |
| State | JAN | FEB | MAR | APR | MAY | JUN | JUL | AUG | SEP | OCT | NOV | DEC | Annual average (2002-2006) | Standard Deviation | Annual Average (1990 - 2003) | Annual Average (2000-2003) | Annual Average (2000-2005) |
| Alabama | 0.5 | 0.6 | 1.8 | 1.0 | 0.4 | 0.3 | 0.3 | 0.9 | 2.0 | 2.3 | 1.1 | 0.6 | 12 | 4.0 | 127 | 136 | 216 |
| Alaska | 0.0 | 0.0 | 0.0 | 0.0 | 0.7 | 15.3 | 24.0 | 39.4 | 0.5 | 0.0 | 0.0 | 0.0 | 80 | 89.3 | 40 | 42 |  |
| Arizona | 0.1 | 0.1 | 0.1 | 0.2 | 0.5 | 4.1 | 1.8 | 0.3 | 0.6 | 0.9 | 0.5 | 0.2 | 9 | 3.8 | 75 | 88 | 152 |
| Arkansas | 0.2 | 0.2 | 1.1 | 0.7 | 0.1 | 0.3 | 0.7 | 1.2 | 1.9 | 2.1 | 0.6 | 0.3 | 9 | 2.2 | 58 | 63 | 207 |
| California | 0.1 | 0.3 | 0.4 | 0.5 | 0.5 | 1.2 | 3.6 | 4.0 | 6.5 | 4.9 | 1.1 | 0.4 | 24 | 11.1 | 362 | 383 | 475 |
| Colorado | 0.0 | 0.0 | 0.1 | 0.2 | 0.2 | 1.2 | 0.6 | 0.6 | 0.2 | 0.1 | 0.0 | 0.0 | 3 | 4.1 | 77 | 90 | 245 |
| Connecticut | 0.0 | 0.0 | 0.0 | 0.0 | 0.0 | 0.0 | 0.0 | 0.0 | 0.0 | 0.0 | 0.0 | 0.0 | 0 | 0.0 | 41 | 42 | 22 |
| Delaware | 0.0 | 0.0 | 0.0 | 0.0 | 0.0 | 0.0 | 0.0 | 0.0 | 0.0 | 0.0 | 0.0 | 0.0 | 0 | 0.0 | 18 | 17 | 8 |
| Florida | 1.6 | 1.7 | 2.0 | 1.5 | 1.1 | 0.6 | 0.7 | 0.6 | 0.6 | 0.6 | 0.7 | 0.7 | 12 | 4.5 | 216 | 241 | 320 |
| Georgia | 0.8 | 0.7 | 2.7 | 1.9 | 0.8 | 0.3 | 0.5 | 0.5 | 0.9 | 1.3 | 0.8 | 0.6 | 12 | 4.1 | 152 | 166 | 282 |
| Idaho | 0.0 | 0.0 | 0.1 | 0.3 | 0.4 | 0.1 | 1.0 | 5.1 | 4.2 | 1.7 | 0.5 | 0.0 | 13 | 8.1 | 14 | 15 | 206 |
| Illinois | 0.0 | 0.0 | 0.1 | 0.2 | 0.0 | 0.1 | 0.1 | 0.1 | 0.1 | 0.0 | 0.0 | 0.0 | 1 | 0.1 | 215 | 230 | 176 |
| Indiana | 0.0 | 0.0 | 0.0 | 0.1 | 0.0 | 0.0 | 0.0 | 0.0 | 0.0 | 0.0 | 0.0 | 0.0 | 0 | 0.1 | 217 | 233 | 127 |
| Iowa | 0.0 | 0.0 | 0.0 | 0.2 | 0.0 | 0.0 | 0.0 | 0.0 | 0.0 | 0.0 | 0.0 | 0.0 | 0 | 0.1 | 73 | 80 | 183 |
| Kansas | 0.0 | 0.0 | 0.4 | 2.4 | 0.0 | 0.1 | 0.6 | 0.1 | 0.1 | 0.1 | 0.0 | 0.0 | 4 | 2.1 | 73 | 76 | 234 |
| Kentucky | 0.0 | 0.0 | 0.1 | 0.2 | 0.0 | 0.0 | 0.0 | 0.1 | 0.1 | 0.0 | 0.0 | 0.0 | 1 | 0.2 | 138 | 147 | 172 |
| Louisiana | 0.7 | 0.4 | 0.7 | 0.7 | 0.7 | 0.6 | 1.0 | 1.5 | 2.0 | 2.7 | 1.2 | 0.7 | 13 | 3.7 | 182 | 187 | 203 |
| Maine | 0.0 | 0.0 | 0.0 | 0.0 | 0.0 | 0.0 | 0.0 | 0.0 | 0.0 | 0.0 | 0.0 | 0.0 | 0 | 0.0 | 20 | 23 | 138 |
| Maryland | 0.0 | 0.0 | 0.0 | 0.0 | 0.0 | 0.0 | 0.0 | 0.0 | 0.0 | 0.0 | 0.0 | 0.0 | 0 | 0.0 | 73 | 77 | 38 |
| Massachusetts | 0.0 | 0.0 | 0.0 | 0.0 | 0.0 | 0.0 | 0.0 | 0.0 | 0.0 | 0.0 | 0.0 | 0.0 | 0 | 0.0 | 83 | 84 | 37 |
| Michigan | 0.0 | 0.0 | 0.0 | 0.1 | 0.0 | 0.1 | 0.1 | 0.1 | 0.0 | 0.0 | 0.0 | 0.0 | 0 | 0.1 | 188 | 189 | 253 |
| Minnesota | 0.0 | 0.0 | 0.0 | 0.4 | 0.3 | 0.0 | 0.2 | 0.0 | 0.2 | 0.1 | 0.0 | 0.0 | 1 | 0.5 | 91 | 99 | 319 |
| Mississippi | 0.3 | 0.3 | 1.0 | 0.5 | 0.3 | 0.4 | 0.3 | 0.6 | 1.4 | 1.6 | 0.6 | 0.4 | 8 | 3.0 | 55 | 63 | 202 |
| Missouri | 0.0 | 0.1 | 0.4 | 0.7 | 0.0 | 0.1 | 0.0 | 0.1 | 0.2 | 0.1 | 0.1 | 0.0 | 2 | 0.5 | 118 | 131 | 253 |
| Montana | 0.0 | 0.0 | 0.1 | 0.3 | 0.3 | 0.1 | 2.3 | 5.1 | 3.1 | 0.7 | 0.5 | 0.0 | 13 | 14.4 | 30 | 32 | 356 |
| Nebraska | 0.0 | 0.0 | 0.1 | 0.2 | 0.0 | 0.0 | 0.3 | 0.0 | 0.0 | 0.0 | 0.0 | 0.0 | 1 | 0.6 | 39 | 42 | 223 |
| Nevada | 0.0 | 0.0 | 0.0 | 0.0 | 0.0 | 0.4 | 0.7 | 0.3 | 0.2 | 0.0 | 0.0 | 0.0 | 2 | 1.6 | 38 | 44 | 128 |
| New Hampshire | 0.0 | 0.0 | 0.0 | 0.0 | 0.0 | 0.0 | 0.0 | 0.0 | 0.0 | 0.0 | 0.0 | 0.0 | 0 | 0.0 | 16 | 18 | 43 |
| New Jersey | 0.0 | 0.0 | 0.0 | 0.0 | 0.0 | 0.0 | 0.0 | 0.0 | 0.0 | 0.0 | 0.0 | 0.0 | 0 | 0.1 | 122 | 123 | 31 |
| New Mexico | 0.0 | 0.0 | 0.1 | 0.3 | 0.5 | 1.9 | 0.9 | 0.1 | 0.2 | 0.1 | 0.2 | 0.1 | 4 | 1.4 | 54 | 58 | 233 |
| New York | 0.0 | 0.0 | 0.0 | 0.0 | 0.0 | 0.0 | 0.0 | 0.0 | 0.0 | 0.0 | 0.0 | 0.0 | 0 | 0.1 | 205 | 210 | 213 |
| North Carolina | 0.2 | 0.2 | 0.4 | 0.5 | 0.3 | 0.4 | 0.3 | 0.3 | 0.4 | 0.3 | 0.2 | 0.1 | 3 | 0.5 | 133 | 146 | 237 |
| North Dakota | 0.0 | 0.0 | 0.0 | 0.2 | 0.3 | 0.0 | 0.0 | 0.0 | 0.1 | 0.2 | 0.1 | 0.0 | 1 | 0.3 | 48 | 51 | 190 |
| Ohio | 0.0 | 0.0 | 0.0 | 0.1 | 0.1 | 0.1 | 0.2 | 0.2 | 0.2 | 0.1 | 0.0 | 0.0 | 1 | 0.3 | 256 | 261 | 159 |
| Oklahoma | 0.2 | 0.2 | 1.7 | 1.6 | 0.1 | 0.2 | 0.3 | 0.3 | 0.3 | 0.3 | 0.2 | 0.2 | 6 | 2.1 | 97 | 102 | 228 |
| Oregon | 0.0 | 0.2 | 0.3 | 0.4 | 0.5 | 0.4 | 5.6 | 5.2 | 1.4 | 1.6 | 1.9 | 0.2 | 18 | 15.5 | 38 | 41 | 396 |
| Pennsylvania | 0.0 | 0.0 | 0.0 | 0.0 | 0.1 | 0.1 | 0.1 | 0.1 | 0.0 | 0.0 | 0.0 | 0.0 | 0 | 0.1 | 267 | 269 | 208 |
| Rhode Island | 0.0 | 0.0 | 0.0 | 0.0 | 0.0 | 0.0 | 0.0 | 0.0 | 0.0 | 0.0 | 0.0 | 0.0 | 0 | 0.0 | 12 | 12 | 6 |
| South Carolina | 0.3 | 0.3 | 1.2 | 0.6 | 0.3 | 0.2 | 0.3 | 0.2 | 0.3 | 0.2 | 0.1 | 0.1 | 4 | 1.6 | 69 | 78 | 148 |
| South Dakota | 0.0 | 0.0 | 0.0 | 0.1 | 0.0 | 0.1 | 0.2 | 0.2 | 0.0 | 0.1 | 0.0 | 0.0 | 1 | 0.5 | 13 | 14 | 211 |
| Tennessee | 0.0 | 0.0 | 0.3 | 0.2 | 0.0 | 0.1 | 0.1 | 0.2 | 0.2 | 0.1 | 0.0 | 0.0 | 1 | 0.5 | 114 | 122 | 188 |
| Texas | 0.6 | 0.8 | 1.5 | 1.1 | 0.7 | 0.6 | 0.9 | 1.7 | 1.6 | 1.5 | 0.9 | 0.6 | 12 | 3.6 | 604 | 658 | 809 |
| Utah | 0.0 | 0.0 | 0.0 | 0.1 | 0.1 | 0.9 | 1.1 | 0.3 | 0.2 | 0.2 | 0.0 | 0.0 | 3 | 1.6 | 59 | 63 | 111 |
| Vermont | 0.0 | 0.0 | 0.0 | 0.0 | 0.0 | 0.0 | 0.0 | 0.0 | 0.0 | 0.0 | 0.0 | 0.0 | 0 | 0.0 | 6 | 6 | 43 |
| Virginia | 0.0 | 0.0 | 0.1 | 0.2 | 0.1 | 0.1 | 0.2 | 0.3 | 0.3 | 0.3 | 0.1 | 0.0 | 2 | 0.4 | 108 | 121 | 185 |
| Washington | 0.0 | 0.0 | 0.2 | 0.2 | 0.3 | 0.1 | 3.1 | 4.5 | 2.8 | 1.3 | 0.7 | 0.0 | 13 | 11.8 | 78 | 81 | 306 |
| West Virginia | 0.0 | 0.0 | 0.0 | 0.1 | 0.0 | 0.0 | 0.1 | 0.1 | 0.1 | 0.0 | 0.0 | 0.0 | 1 | 0.1 | 107 | 113 | 134 |
| Wisconsin | 0.0 | 0.0 | 0.0 | 0.2 | 0.1 | 0.0 | 0.0 | 0.0 | 0.0 | 0.0 | 0.0 | 0.0 | 0 | 0.1 | 99 | 107 | 223 |
| Wyoming | 0.0 | 0.0 | 0.0 | 0.1 | 0.0 | 0.2 | 0.7 | 1.0 | 0.2 | 0.1 | 0.0 | 0.0 | 2 | 1.6 | 59 | 62 | 165 |
| TOTAL | 6 | 6 | 17 | 18 | 10 | 31 | 53 | 75 | 33 | 26 | 12 | 5 | 293 | 56 | 5,378 | 5,738 |  |
| TOTAL (LOWER48) | **6** | **6** | **17** | **18** | **9** | **16** | **29** | **36** | **32** | **26** | **12** | **5** | **213** | **50** | **5,338** | **5,695** | **9,639** |
